# Supplementary material for: Understanding charge transport and dielectric relaxation properties in lead-free Cs 2 ZrCl 6 nanoparticles
Source: Royal Society of Chemistry journal article supplement (doi:10.1039/d4ra02031f), 2024-01-01
Supplement: d4ra02031f1.pdf [file d4ra02031f1.pdf]

## Supporting Information

### Understanding Charge Transport and Dielectric Relaxation Properties in Lead-Free Cs<sub>2</sub>ZrCl<sub>6</sub> Nanoparticles

Mohamed Ben Bechir <sup>\*,a</sup>, Mehdi Akermi <sup>b,c</sup>, Hussain J Alathlawi <sup>b</sup>

<sup>a</sup> *Laboratory of Spectroscopic and Optical Characterization of Materials (LaSCOM),  
Faculty of Sciences, University of Sfax, BP1171 – 3000 Sfax, Tunisia.*

<sup>b</sup> *Department Physics, College of Sciences, Jazan University, P. O. Box. 114, Jazan, 45142, Kingdom  
of Saudi Arabia. E-mail: [makermi@jazanu.edu.sa](mailto:makermi@jazanu.edu.sa), [hathlawi@jazanu.edu.sa](mailto:hathlawi@jazanu.edu.sa)*

<sup>c</sup> *Laboratory of Interfaces and Advanced Materials, Faculty of Science, Boulevard of the Environment,  
University of Monastir, 5019, Monastir, Tunisia*

<sup>\*</sup> *Corresponding author. E-mail address: [mohamedbenbechir@hotmail.com](mailto:mohamedbenbechir@hotmail.com)*

### Supplementary Figures

(a)

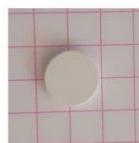

(b)

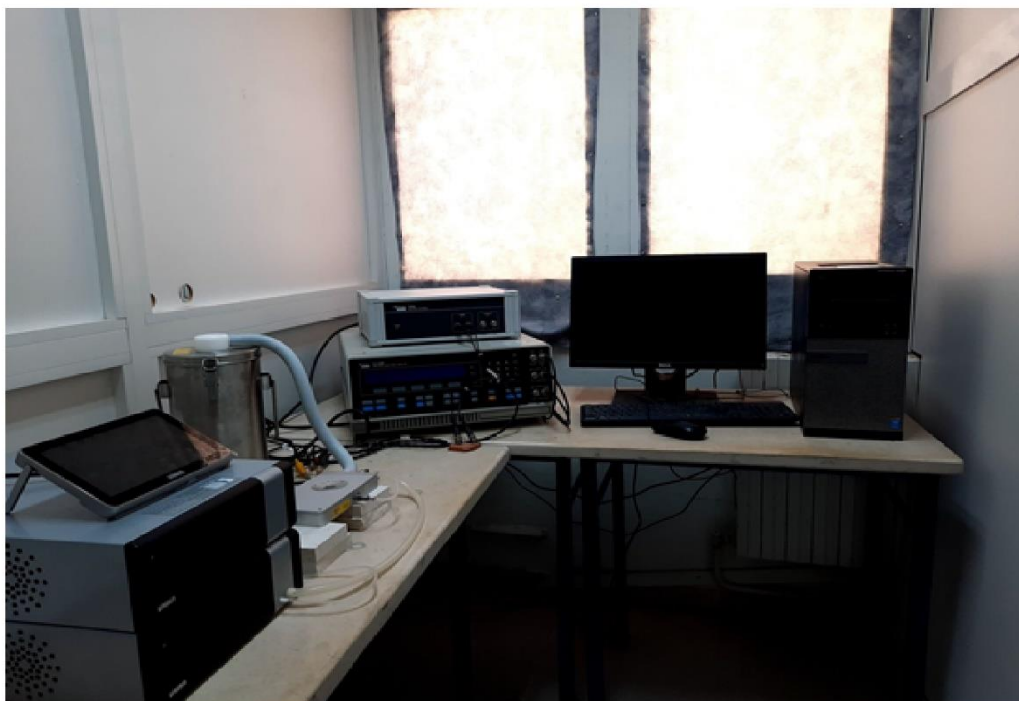

**Fig. S1.** (a) Visual Representation of Cs<sub>2</sub>ZrCl<sub>6</sub> Pellet. (b) Setup Utilized for Measuring Electrical and Dielectric Properties via Complex Impedance Spectroscopy.

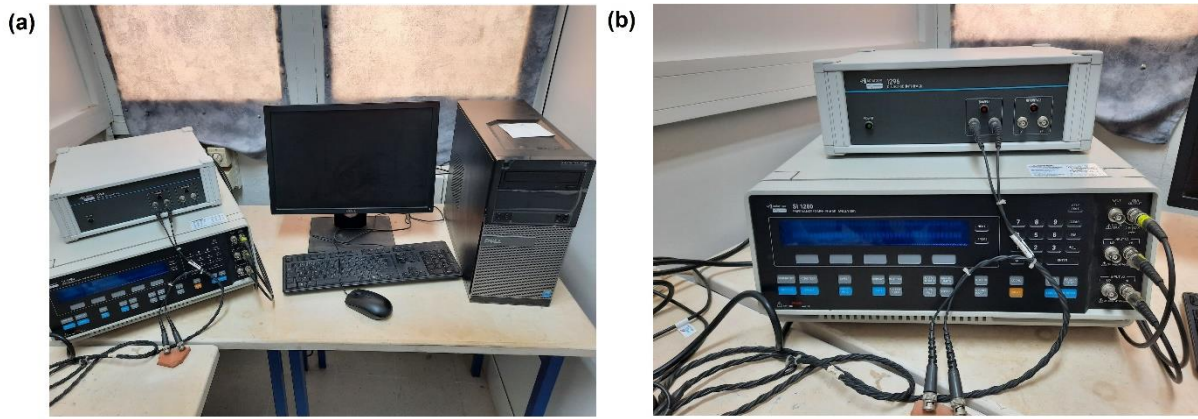

**Fig. S2.** Images of the TH2828A Impedance Analyzer.

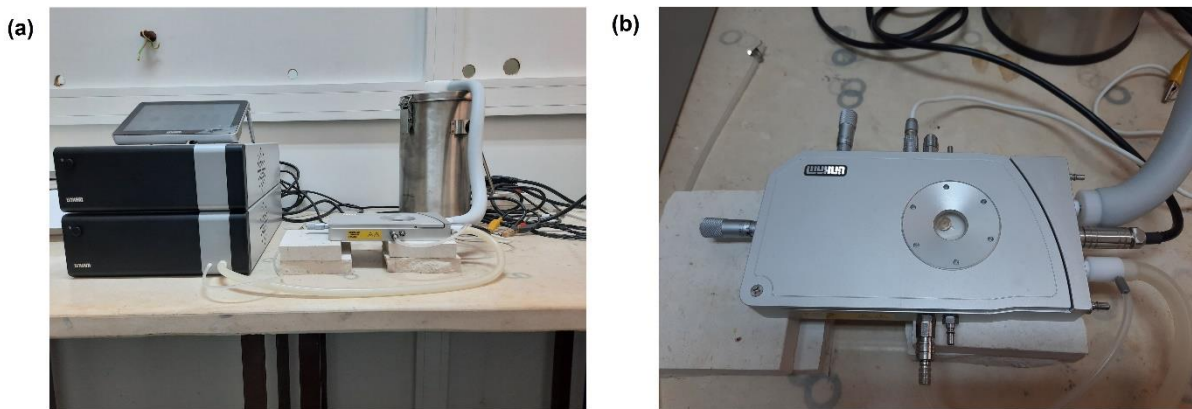

**Fig. S3.** Images of the Linkam Scientific TP94 Temperature Controller.
